# Supplementary material
Source: PubMed Central journal article supplement (PMC3160500)

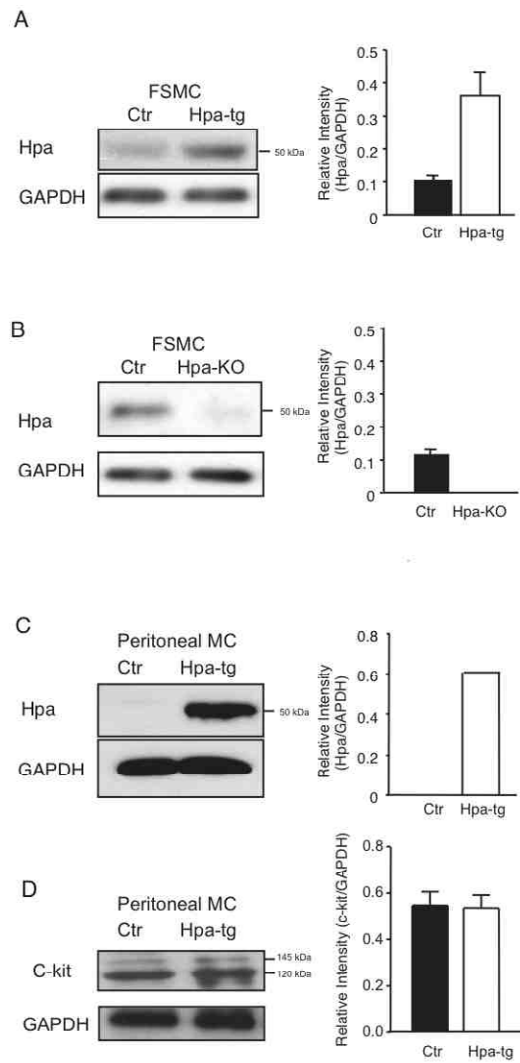

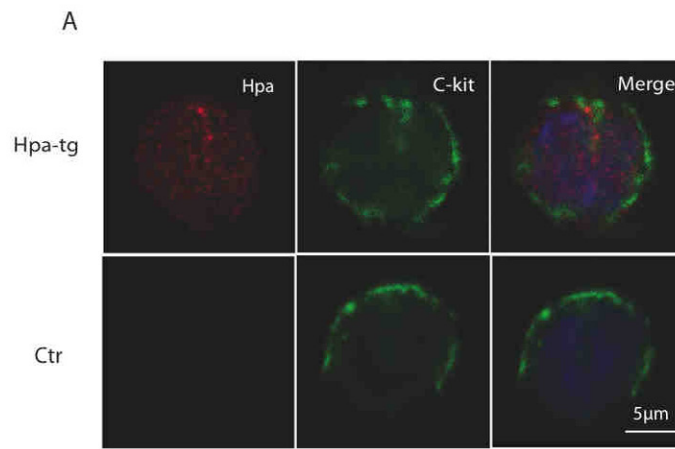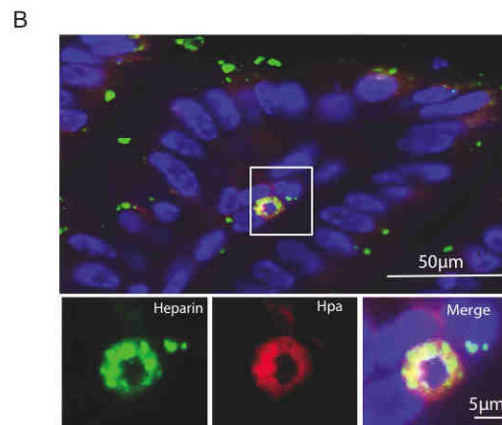

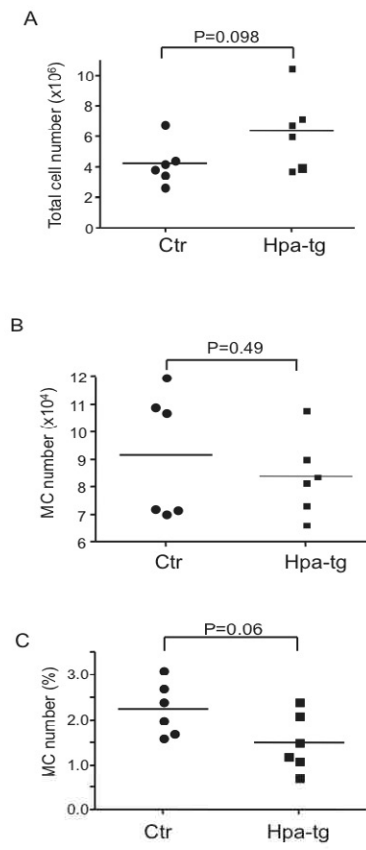

Wang et al, Fig. E3

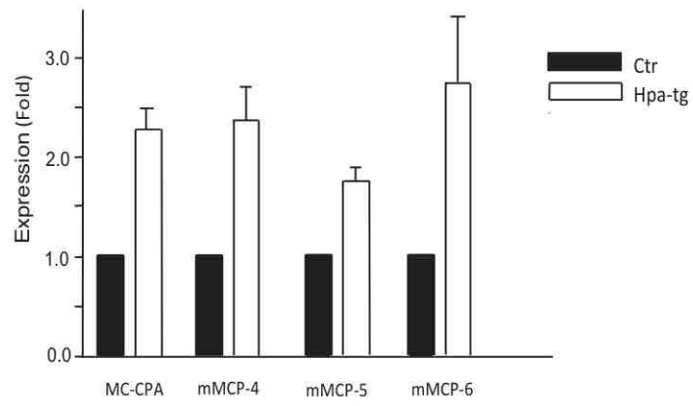

Wang et al, Fig.E4

A

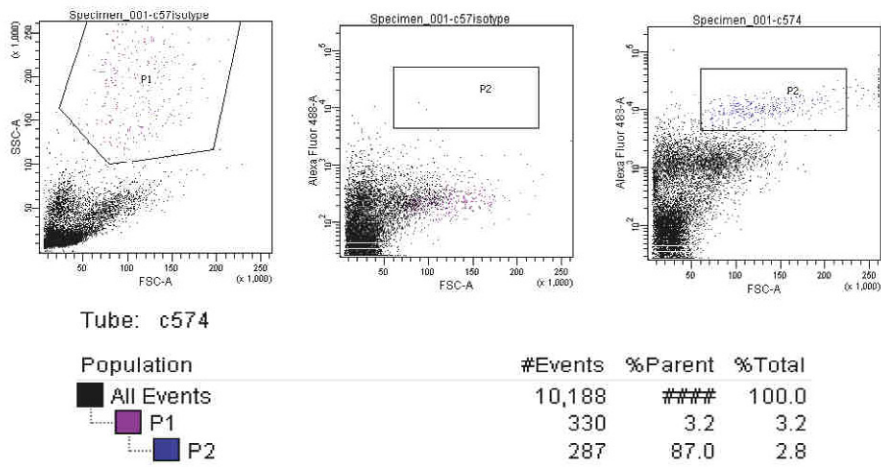

B

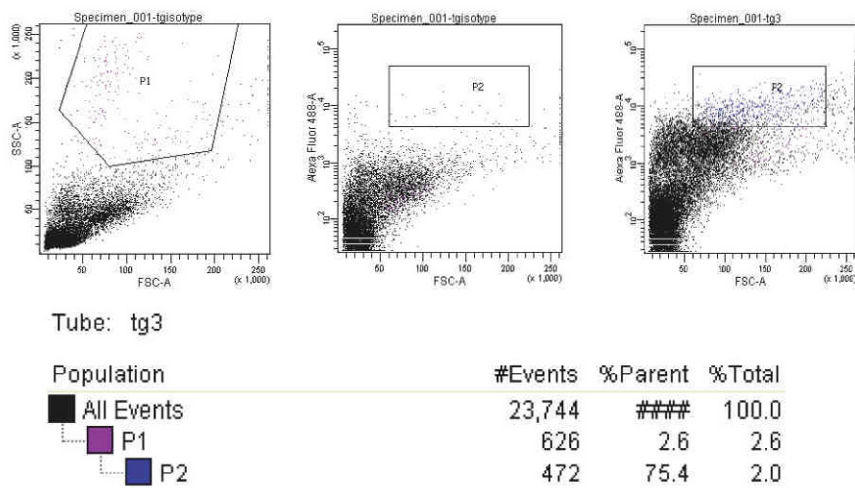

Supplement: NIHMS288721-supplement-supplement_1.pdf [file NIHMS288721-supplement-supplement_1.pdf]
